# Supplementary material for: Gli3 is a novel downstream target of miR-200a with an anti-fibrotic role for progression of liver fibrosis in vivo and in vitro
Source: PubMed Central journal article supplement — Mol Med Rep. 2020 Feb 21;21(4):1861–71. doi: 10.3892/mmr.2020.10997 (PMC7057771; doi:10.3892/mmr.2020.10997), 2020-02-21
Supplement: Supplementary_Data.pdf [file Supplementary_Data.pdf]

Figure S1. Transfection efficiency in LX2 cells was measured using plasmids encoding GFP. (A) LX2 cells co-transfected with miR-200a mimics. (B) LX2 cells co-transfected with miR-200a inhibitor. (C) LX2 cells transfected with NC plasmids.

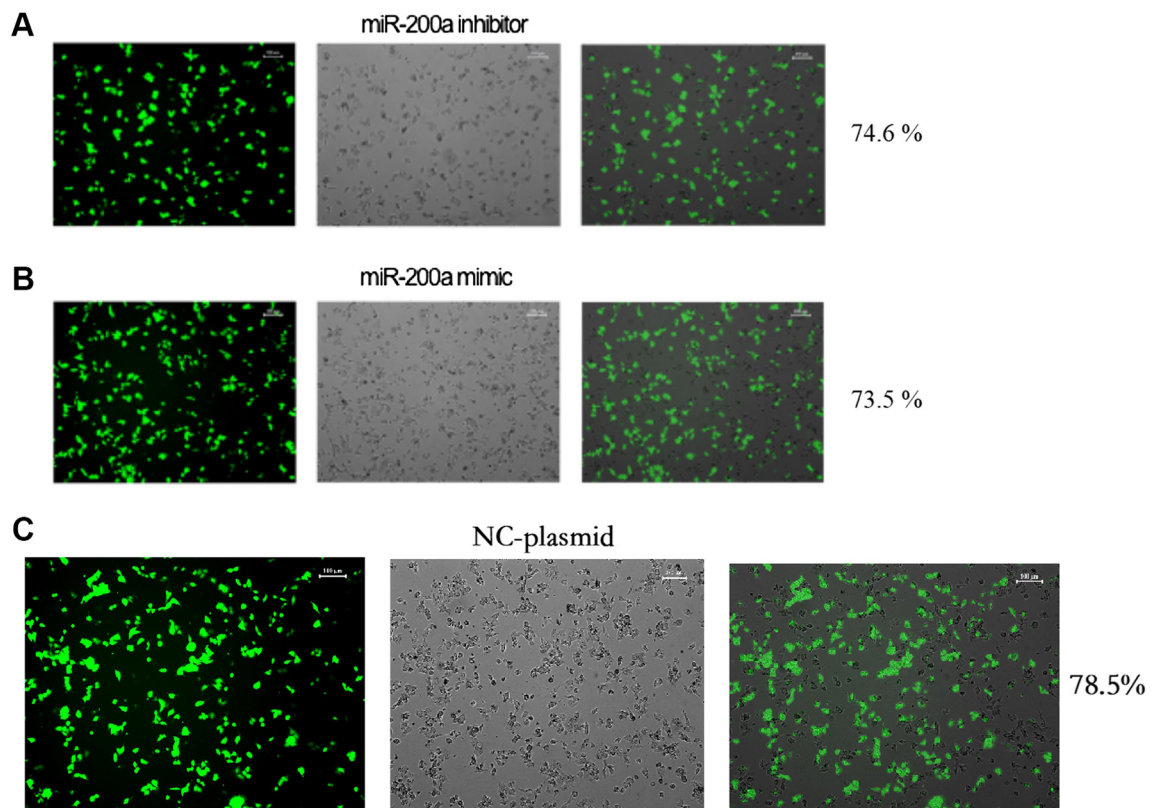

Table SI. Clinical parameters of patients in Groups I and II.

| Characteristic       | Group I,<br>no. of patients | Group II,<br>no. of patients |
|----------------------|-----------------------------|------------------------------|
| Mean age, years      | 53.5                        | 52.6                         |
| Sex                  |                             |                              |
| Male                 | 6                           | 8                            |
| Female               | 4                           | 2                            |
| Hepatitis B-positive | 7                           | 6                            |
| Hepatitis C-positive | 1                           | 2                            |

Table SII. Computational prediction of partial GLI family zinc finger 3-targeting miRNAs by TargetScan.

| miRNA           | Conserved site | Context++score | P <sub>CT</sub> |
|-----------------|----------------|----------------|-----------------|
| hsa-miR-200b-3p | 7mer-m8        | -0.19          | 0.91            |
| hsa-miR-200c-3p | 7mer-m8        | -0.19          | 0.91            |

miRNA/miR, microRNA.
